# Supplementary material for: 3D printed, environment tolerant all-solid-state capacitive ionic skin
Source: Royal Society of Chemistry journal article supplement (doi:10.1039/d2ta05388h), 2022-01-01
Supplement: d2ta05388h1.pdf [file d2ta05388h1.pdf]

## Supporting Information

### **3D Printed, Environment-tolerant All-Solid-State Capacitive Ionic Skin**

Yixuan Wu,<sup>a</sup> Ling Cai,<sup>a</sup> Guangxue Chen,<sup>a</sup> Fengzhi Yang,<sup>b</sup> and Minghui He <sup>\*a</sup>

<sup>a</sup> State Key Laboratory of Pulp and Paper Engineering, School of Light Industry and Engineering, South China University of Technology, Guangzhou 510640, China

E-mail: heminghui@scut.edu.cn

<sup>b</sup> Zhongshan Qianyou Chemical Materials CO.,LTD, Zhongshan 528400, China

\* Corresponding author's E-mail: heminghui@scut.edu.cn

## Supplementary Note

**Modelling of capacitive sensors.** The contact area of SCIS can be divided into two types: real contact area ( $A_{con}$ ) and suspended area ( $A_{sus}$ ). The contact area ( $A$ ) of a SCIS can be divided into 25 sensing unit contact areas ( $A_{unit}$ ) and 11 suspended area ( $A_{sus}$ ) (Fig. S8), and each unit cell of the device is defined by two types of areal components: a real contact area  $A_{con}$  and a suspended area  $A_{sus}$  (Fig. S9).

$$A = 25A_{unit} + 11A_{sus} \quad (1)$$

$$A_{unit} = A_{con} + A_{sus} \quad (2)$$

Hence, the total capacitance of a unit cell ( $C_{unit}$ ) is composed of a real contact capacitance  $C_{con}$  and a suspended capacitance  $C_{sus}$ . It is described as equation (3).

$$C_{unit} = C_{con} + C_{sus} \quad (3)$$

where  $C_{con}$  is the capacitance of the PET dielectric between two PDES electrodes given by

$$C_{con} = C_{PET} = \varepsilon_0 \varepsilon_1 \frac{A_{con}}{d_0} \quad (4)$$

where,  $\varepsilon_0$  is the dielectric constant of vacuum ( $\varepsilon_0 = 8.85 \times 10^{-12}$  F m<sup>-1</sup>),  $\varepsilon_1$  is the relative dielectric constant for the PET layer and  $d_0$  is the initial thickness of the PET dielectric layer.

$C_{sus}$  is the capacitance of the upper-suspended portion given by

$$\frac{1}{C_{sus}} = \frac{1}{C_{PET}} + \frac{1}{C_{air1}} + \frac{1}{C_{air2}} \quad (5)$$

where,  $C_{PET}$  is the capacitance of the PET dielectric layer at the suspended portion given by

$$C_{PET} = \varepsilon_0 \varepsilon_1 \frac{A_{sus}}{d_0} \quad (6)$$

$C_{air1}$  and  $C_{air2}$  are the capacitance of the upper and lower air gap at the suspended portion respectively given by

$$C_{air1} = \varepsilon_0 \frac{A_{sus}}{d_1} \quad (7)$$

$$C_{air2} = \varepsilon_0 \frac{A_{sus}}{d_2} \quad (8)$$

where  $d_1$  and  $d_2$  are the thickness of the upper and lower air gap ( $d_1 = d_2 = 600$  μm), and in this work, it is equal to the line height of the upper and lower electrode structure. Substituting (6), (7) and (8) into (5), we obtain:

$$C_{sus} = \varepsilon_0 \varepsilon_1 \frac{A_{sus}}{d_0 + \varepsilon_1 d_1 + \varepsilon_1 d_2} \quad (9)$$

Hence, the capacitance of an entire capacitive ionic skin is thus given by

$$C = 25C_{unit} + 11C_{sus} = 25(C_{con} + C_{sus}) + 11C_{sus} = \varepsilon_0 \varepsilon_1 \left( \frac{25A_{con}}{d_0} + \frac{36A_{sus}}{d_0 + \varepsilon_1 d_1 + \varepsilon_1 d_2} \right) \quad (10)$$

## Supplementary Figures

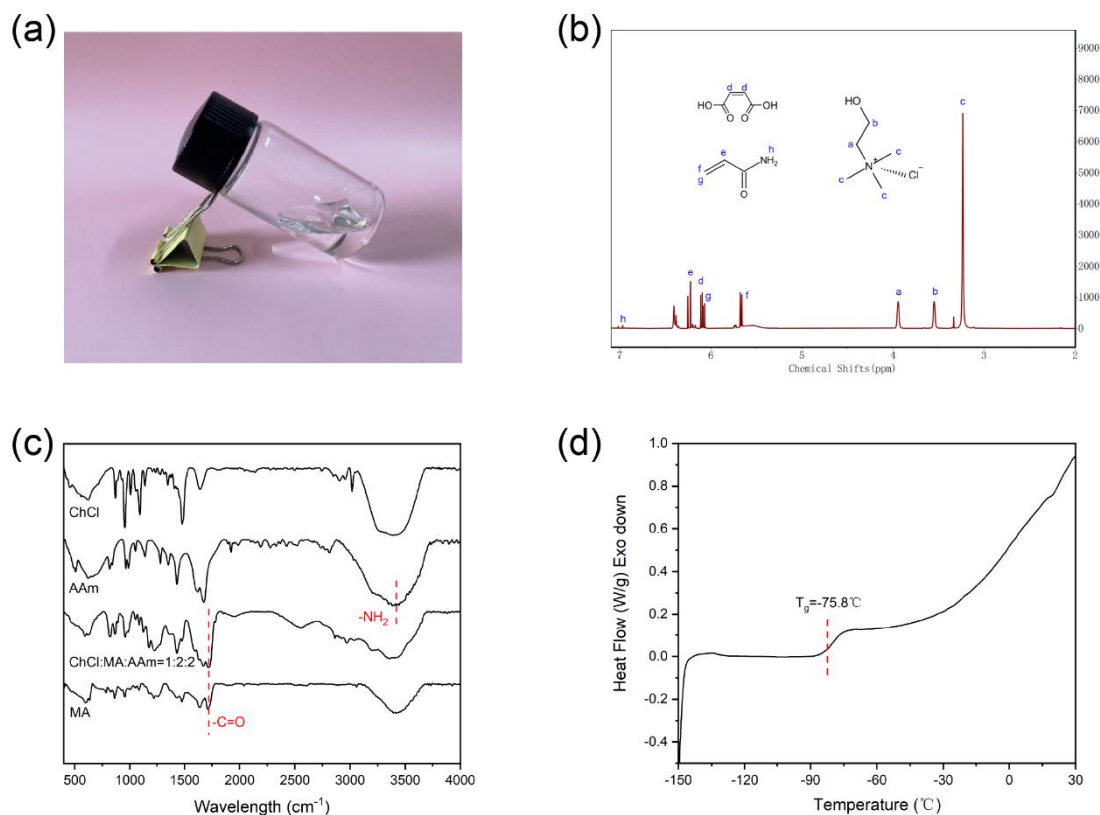

**Fig. S1.** The preparation and characterization of AAm/ChCl-MA/ChCl type polymerizable deep eutectic solvents (PDES). (a) Digital photographs of transparent AAm/ChCl-MA/ChCl type PDES liquid before polymerization. (b)  $^1\text{H}$  NMR spectra of AAm/ChCl-MA/ChCl type PDES. The spectrums were recorded using  $\text{CDCl}_3$  as the external reference. The peak in the spectrum shifts to a lower field due to hydrogen bonding. (c) FTIR spectrums of AAm/ChCl-MA/ChCl type PDES and individual choline-chloride (ChCl), acrylic amide (AAm) and maleic acid (MA). Groups of monomers are present in the spectra. (d) DSC trace of AAm/ChCl-MA/ChCl type PDES. The  $T_g$  point of the mixture is lower than that of the single monomers used to synthesis PDES.

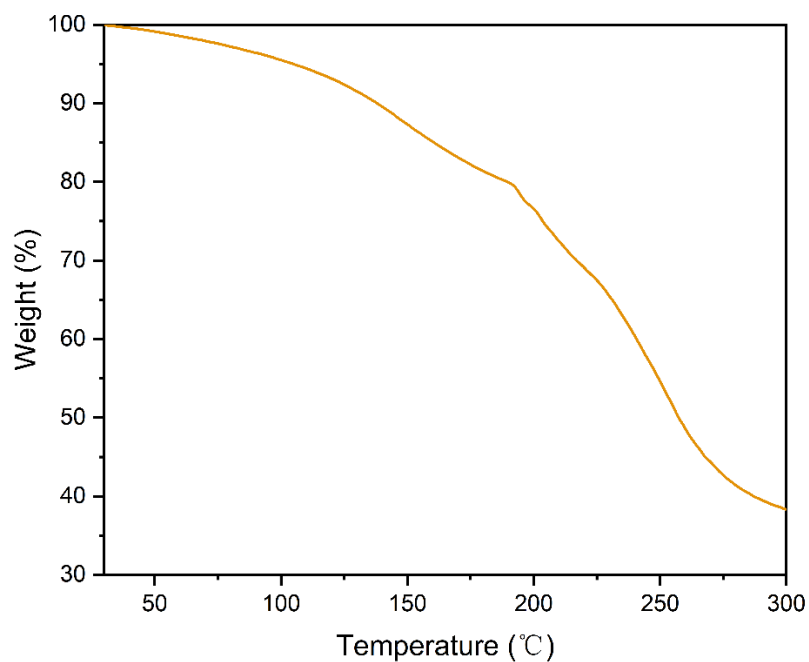

**Fig. S2.** The thermogravimetric analysis curve of SCIS.

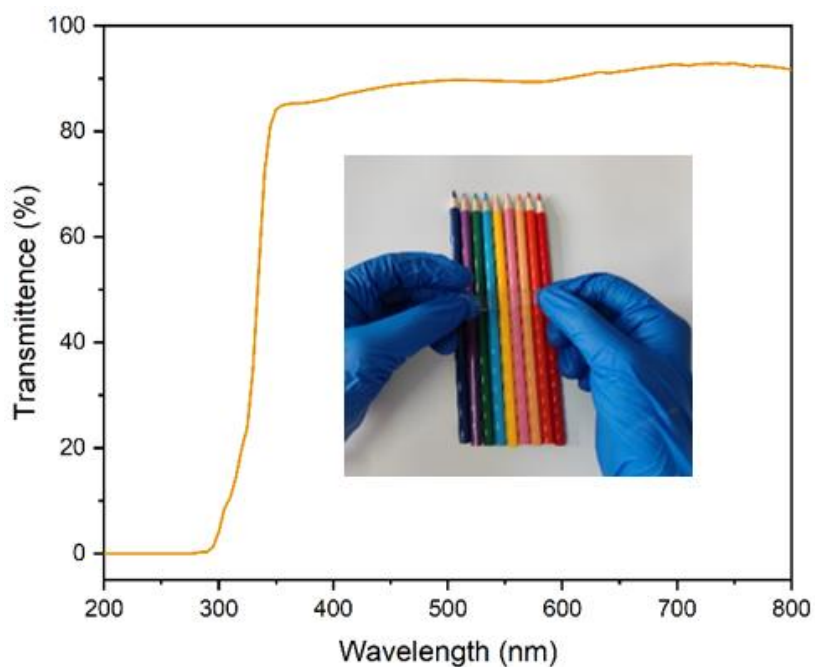

**Fig. S3.** Digital optical image of a poly(AAm/ ChCl-co-MA/ChCl) elastomer film. It is highly transparent and stretchable.

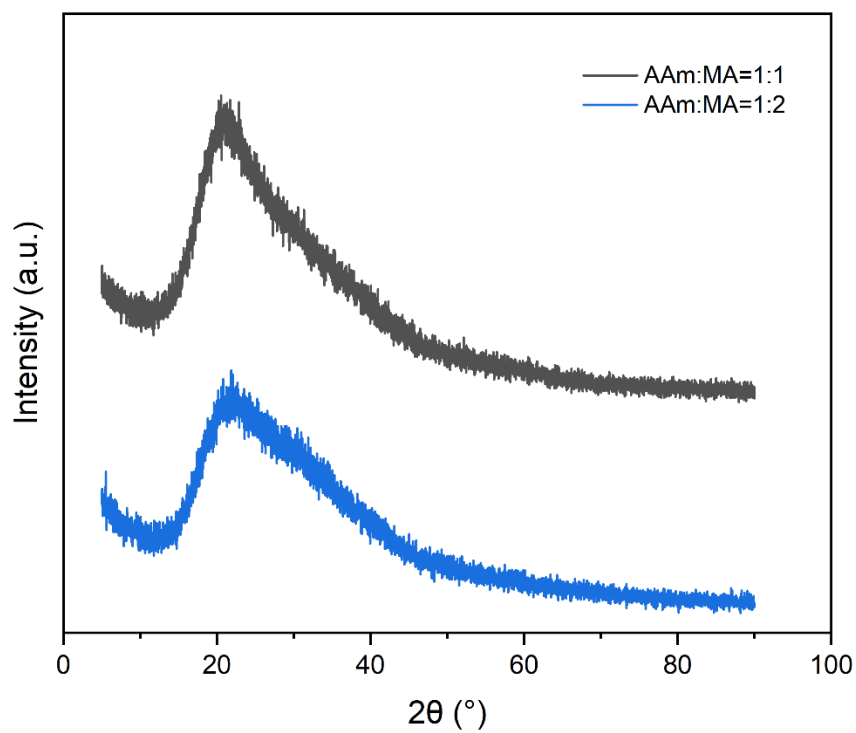

**Fig. S4.** X-ray diffraction (XRD) spectra.

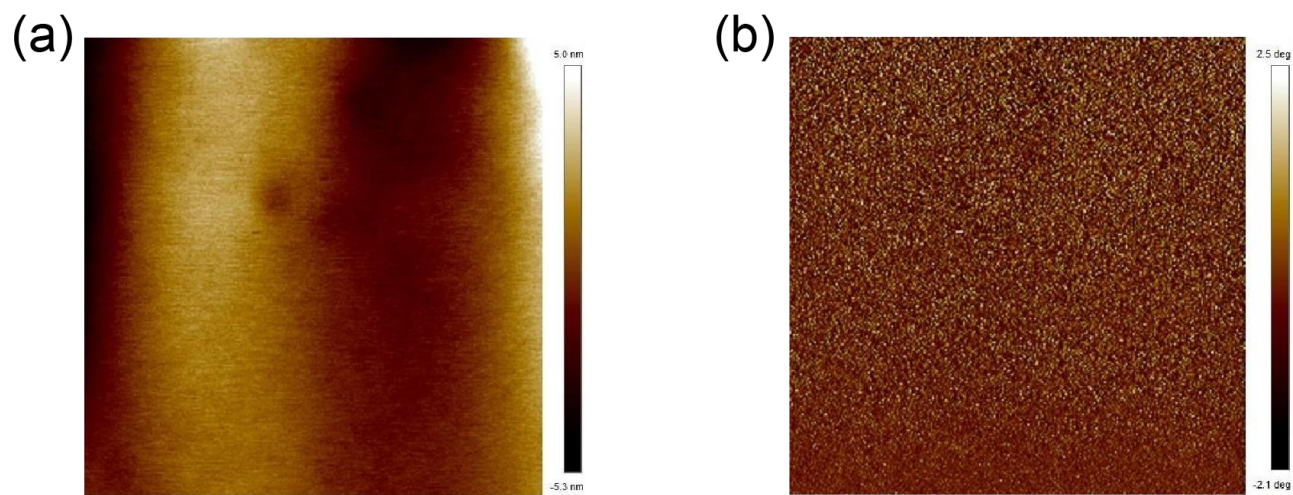

**Fig. S5.** (a) AFM bitmap of SCIS. (b) AFM phase images of SCIS.

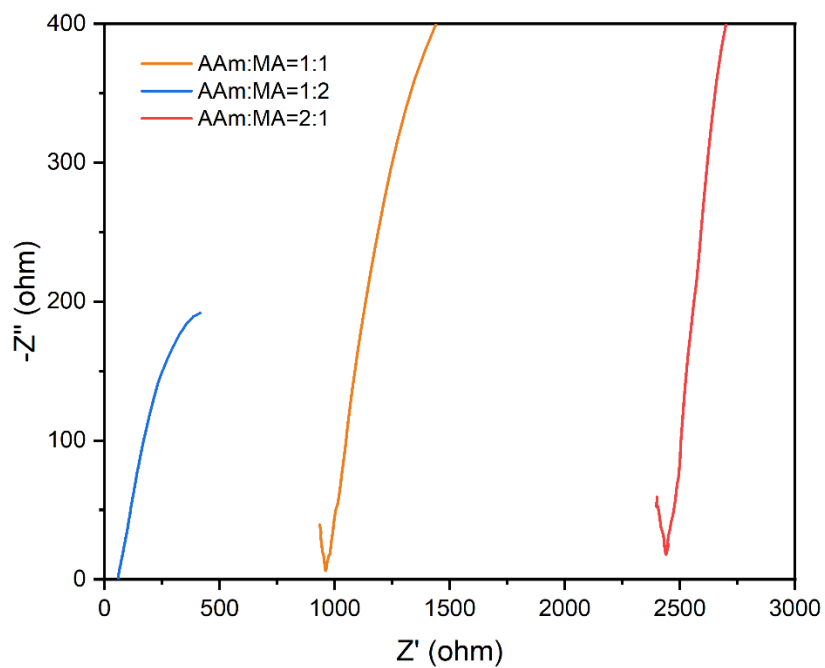

**Fig. S6.** Electrochemical impedance spectroscopy (EIS) plots of a series of poly(AA/ChCl-co-MA/ChCl) films.

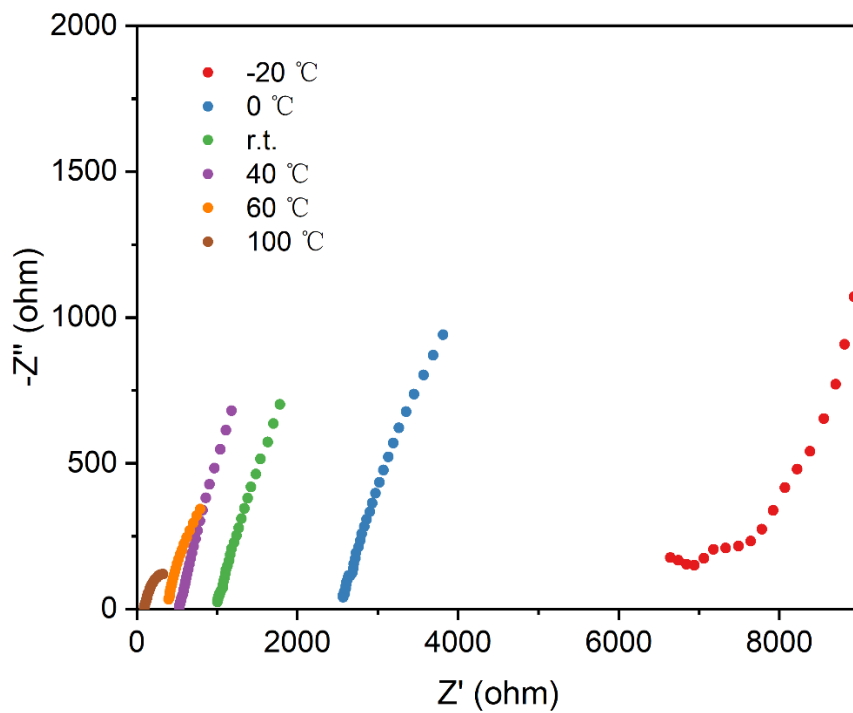

**Fig. S7.** Electrochemical impedance spectroscopy (EIS) plots of SCIS in different temperature.

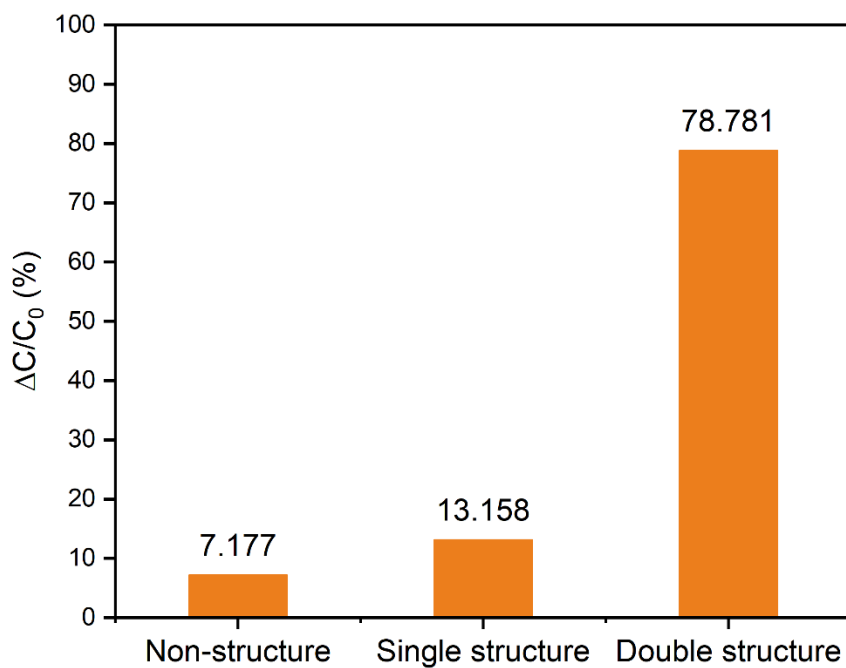

**Fig. S8.** The change of relative capacitance of ionic skin with different structure.

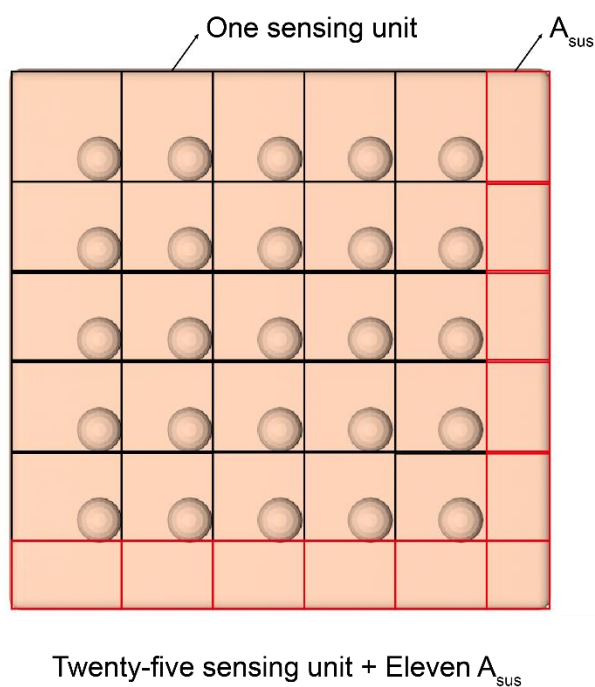

**Fig. S9.** For a SCIS, it can be divided into 25 sensing unit and 11 suspended unit.

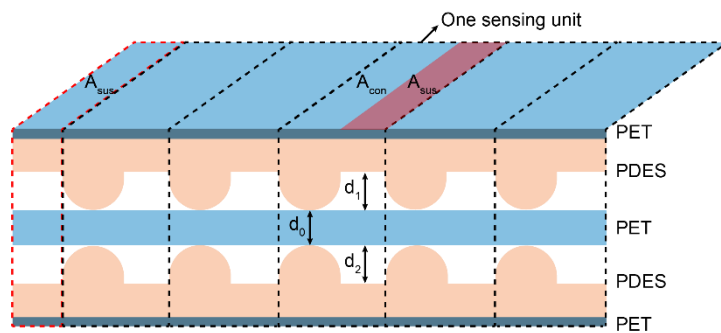

**Fig. S10.** Each unit cell of the device is defined by two types of areal components: a real contact area  $A_{con}$  and a suspended area  $A_{sus}$ .

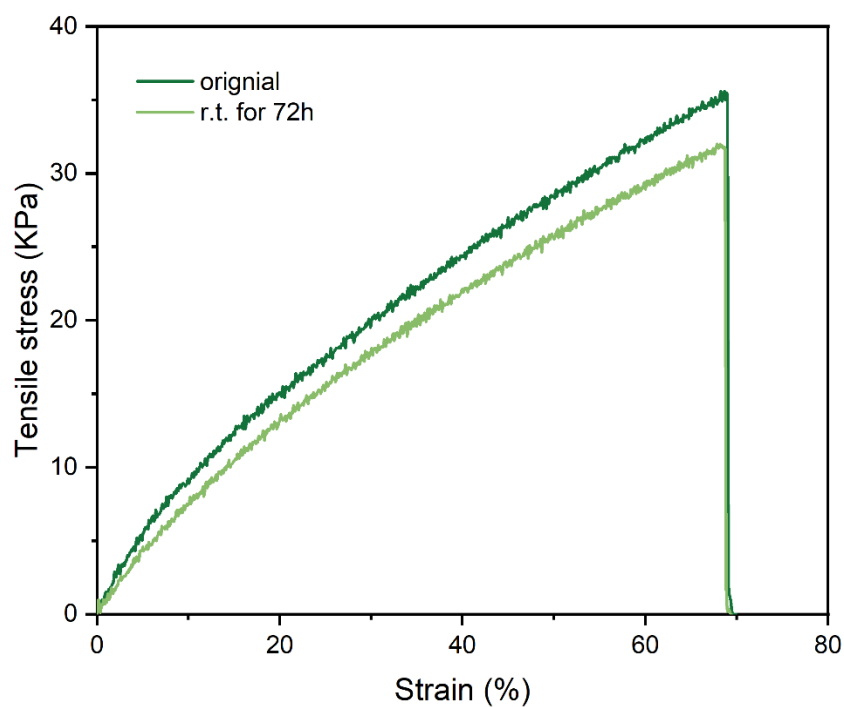

**Fig. S11.** The stress–strain curves of ionic skin healed in room temperature. Sample width, 14 mm; thickness, 1 mm; gage length, 2 mm. Stretching speed,  $10 \text{ mm min}^{-1}$ .



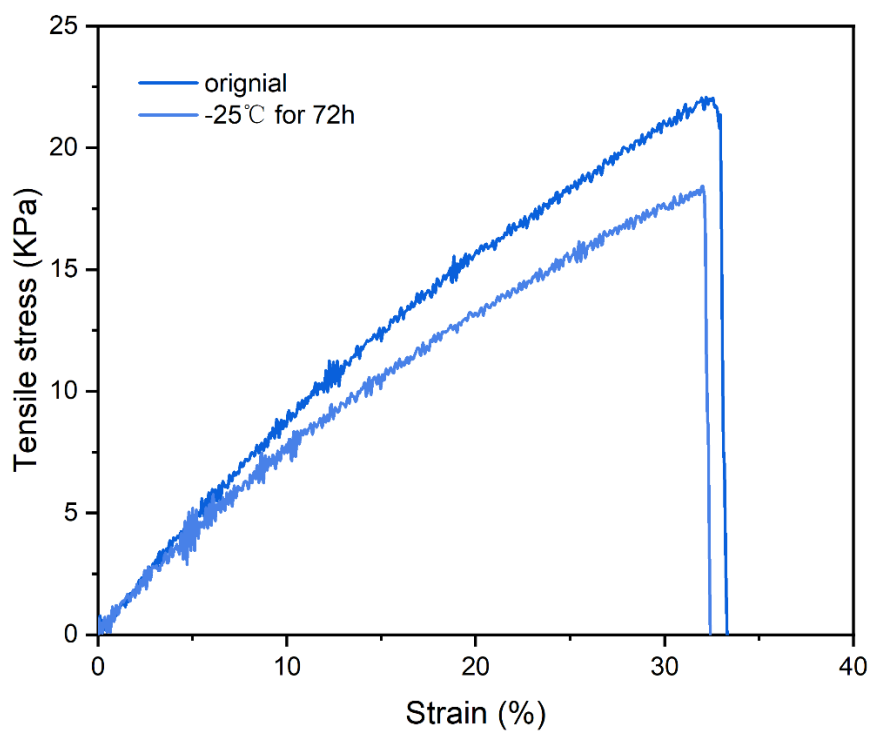

**Fig. S12.** The stress–strain curves of ionic skin healed in  $-70^{\circ}\text{C}$ .

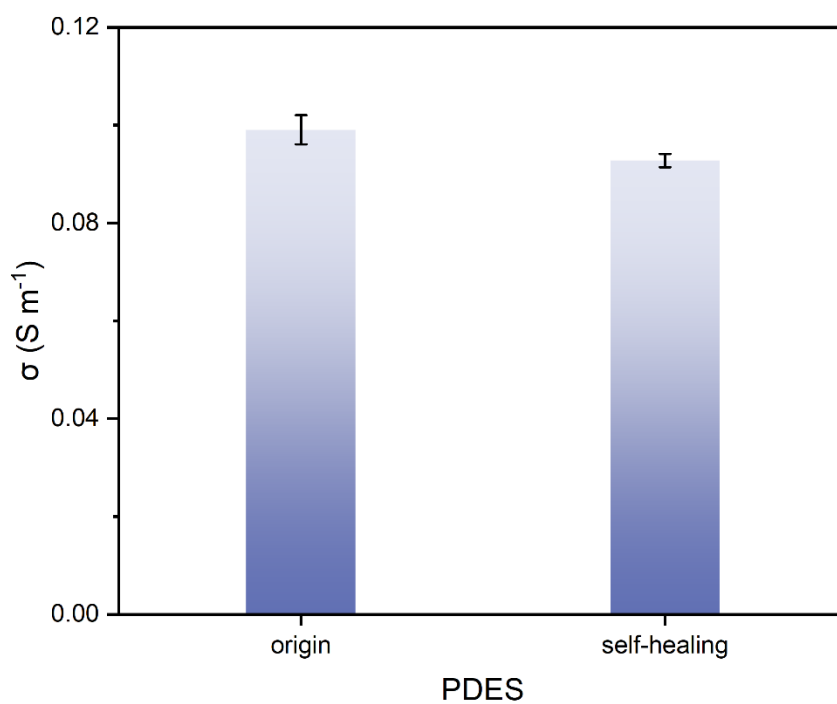

**Fig. S13.** Electrical conductivity of SCIS before and after self-healing.

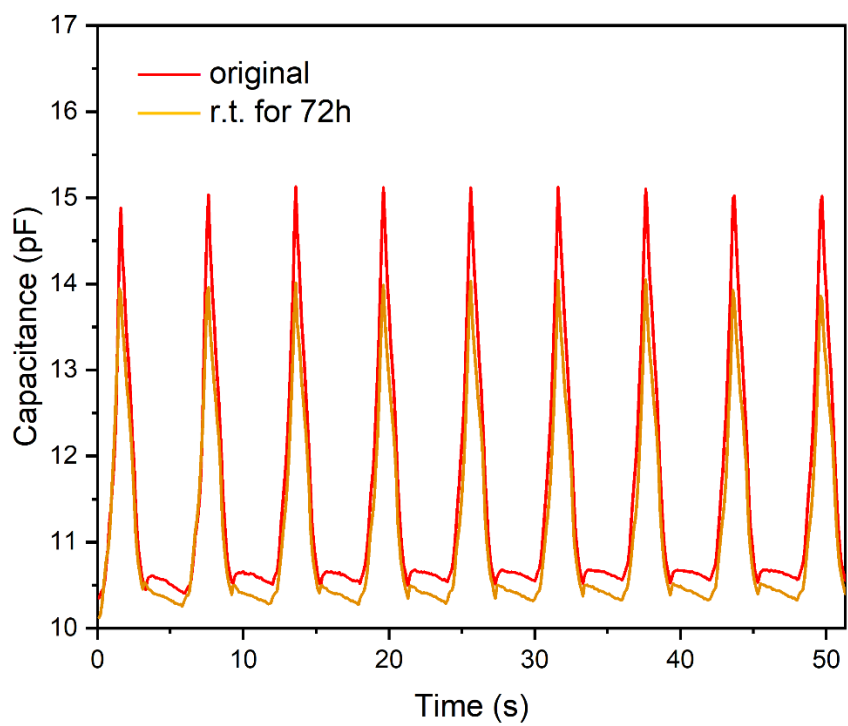

**Fig. S14.** The sensing performance of SCIS before and after self-healing.
